1 **Sequencing from leftover material of stored rapid Ag Tests (Ag-RDTs): a**  
2 **gamechanger in genomic surveillance?**

3

4 Annabel Rector<sup>1</sup>, Mandy Bloemen<sup>1</sup>, Gilberte Schiettekatte<sup>3</sup>, Piet Maes<sup>1</sup>, Marc Van Ranst<sup>1,2</sup>  
5 and Elke Wollants<sup>1\*</sup>

6

7 <sup>1</sup>KU Leuven, Rega Institute, Department of Microbiology, Immunology and Transplantation,  
8 Laboratory of Clinical and Epidemiological Virology, 3000 Leuven, Belgium.

9 <sup>2</sup>University Hospitals Leuven, Department of Laboratory Medicine, National Reference Center for  
10 Respiratory Pathogens, 3000 Leuven, Belgium.

11 <sup>3</sup> Center for Medical Analysis, Departement of Molecular Biology and Immunology, 2200 Herentals,  
12 Belgium

13

14

15

16 \*Corresponding author: [elke.wollants@kuleuven.be](mailto:elke.wollants@kuleuven.be) ; +32 16 32 13 41; Herestraat 49 box 1040,  
17 BE3000 Leuven, Belgium

18

19 ORCID: Annabel Rector (0000-0003-3714-449X); Mandy Bloemen (0000-0002-3395-0462); Piet Maes  
20 (0000-0002-4571-5232); Marc Van Ranst (0000-0002-1674-4157); Elke Wollants (0000-0002-4057-  
21 2236).

22

23

## 24 **ABSTRACT**

25 Archived lateral flow antigen-detection rapid diagnostic tests (Ag-RDTs), used in the diagnosis of  
26 COVID-19, were successfully used to extract viral nucleic acids for subsequent RT-qPCR and  
27 sequencing by Sanger or Nanopore whole genome sequencing (WGS). The method was successfully  
28 applied with different brands of SARS-CoV-2 Ag-RDTs, but also with Ag-RDTs for detection of  
29 influenza, rotavirus and adenovirus 40/41. The buffer used in the Ag-RDT had an important influence  
30 on the RNA yield from the test strip and the efficiency of subsequent sequencing. Our finding that the  
31 test strip in rapid Ag tests is suited to preserve viral genomic material, even for months at room  
32 temperature, and therefore can serve as source material for genetic characterization, could improve  
33 global coverage of genomic surveillance for SARS-CoV-2 as well as for other viruses.

34

## 35 **KEY WORDS**

36 Rapid antigen test (Ag RDT), SARS-CoV-2, influenzavirus, adenovirus, rotavirus, Sanger sequencings,  
37 whole genome sequencing, genomic surveillance.

38

## 39 **INTRODUCTION**

40 With over half a billion cases and more than 6 million reported COVID-19 deaths since its emergence  
41 in December 2019 [1], the COVID-19 pandemic caused by SARS-CoV-2 has brought on major  
42 challenges to health care systems and authorities worldwide. The availability of effective and safe  
43 vaccines is without question an important element in our way out of this crisis. Nevertheless, the  
44 current COVID-19 vaccines are not sufficient to prevent spread and circulation of the virus, even in  
45 highly vaccinated populations [2], and are regrettably not accessible for the entire global population  
46 [3]. Therefore, epidemiological surveillance through timely and adequate diagnostic testing for SARS-

47 CoV-2 to guide preventive measures for the control of COVID-19 will remain vital in the battle against  
48 the virus.

49 Currently, two types of tests are being used in the diagnosis of SARS-CoV-2 infection. Molecular  
50 assays based on the detection of viral RNA through a nucleic acid amplification test (NAAT), such as  
51 real-time reverse transcription quantitative PCR (RT-qPCR), are highly sensitive and specific, but in  
52 most cases require expensive laboratory facilities and trained technicians, making them less suited  
53 for fast scaling-up. An alternative is the detection of viral antigens through immunodiagnostic  
54 techniques such as lateral flow antigen-detection rapid diagnostic tests (Ag-RDTs) that can be visually  
55 read or processed and read by an instrument. These Ag-RDTs can be performed outside the  
56 laboratory, provide a faster result (15 min) and can be produced much faster, cheaper and in large  
57 quantities, allowing for swift upscaling of testing capacity. They can be highly specific, but are  
58 generally not as sensitive as molecular tests, making them effective for identifying infected persons  
59 displaying high virus shedding, who are hence most infectious [4], [5].

60 Although laboratory-based NAAT is still considered to be the reference standard for SARS-CoV-2  
61 diagnosis, the WHO recommends the use of Ag-RDTs as a decentralizable, faster and reliable option,  
62 provided that the tests meet the WHO standards for Ag-RDTs ( $\geq 80\%$  sensitivity and  $\geq 97\%$  specificity  
63 among symptomatic individuals) [6], [7].

64 The continuous evolution of SARS-CoV-2 has already resulted in the emergence of several variants of  
65 interest (VOI) and of concern (VOC) which can be associated with increased transmissibility and/or  
66 immune escape [8], [9]. Therefore, genomic surveillance to allow early identification, detection,  
67 monitoring and reporting of emerging variants can be considered to be equally important as  
68 epidemiological surveillance in achieving effective mitigation and containment of the virus.  
69 Moreover, virus whole genome sequences can be used to investigate spatiotemporal spread and  
70 transmission routes, and can help in the design of diagnostic assays, antivirals and vaccines [10]–[12].

71 Genomic surveillance of SARS-CoV-2 can be achieved by complete genome sequencing (the golden  
72 standard) or by detection of spike protein mutations that are indicative for specific variants through  
73 sequencing of a limited region of interest within the receptor binding domain (RBD) of the viral  
74 genome [13], [14]. These techniques require the retrieval of viral genetic material from a patient  
75 sample, classically the leftover of a nasopharyngeal sample used for NAAT.

76 Based on our previous experience with the preservation and transport of viral material on paper  
77 strips [15]–[18], we wanted to test whether the leftover viral material in the cellulose carrier in the  
78 test strips used in SARS-CoV-2 Ag-RDTs is sufficient to allow extraction of intact viral nucleic acids and  
79 subsequent RT-qPCR, Sanger sequencing and/or whole genome sequencing (WGS).

80 Several other viruses are also frequently diagnosed with Ag-RDTs, and also in these cases obtaining  
81 supplementary information regarding the type or variant through sequencing can be of importance.

82 Genomic surveillance of influenza viruses is being performed by labs worldwide within the  
83 framework of the WHO's Global Influenza Surveillance and Response System (GISRS). They provide  
84 essential information regarding efficacy of vaccines and antiviral drugs against currently circulating  
85 influenza viruses, vaccine strain selection and the potential spill-over of animal influenza viruses to  
86 humans. The surveillance of circulating genotypes of rotavirus is of crucial importance for detection  
87 of novel emerging genotypes and/or antigenic drift of strains that can occur through vaccination and  
88 can lead to decreased efficacy or failure of vaccines. For the cases of hepatitis of unknown etiology  
89 among young children that were under investigation by ECDC at the time of writing [19], an  
90 association with a (novel variant of) human adenovirus 41 (Adv41) is being considered [20], [21].

91 Typing of positive adenovirus samples can therefore be of clinical and epidemiological relevance.

92 In this study, we evaluate the possibility to retrieve leftover material of several viruses from a range  
93 of Ag-RDTs, and after longterm storage at room temperature, for use in molecular genetic analysis.

94

## 95 MATERIALS AND METHODS

### 96 *Samples*

97 For an optimal result, Ag tests need to be performed with fresh samples containing live virus. Since it  
98 was not feasible to perform all Ag tests immediately on infected patients, with sampling using the  
99 swab provided by the supplier, we used anonymized stored nasopharyngeal patient samples as a  
100 proxy. For use on an Ag-RDT, samples need to be stored in PBS and not in inactivated medium such  
101 as zymo, inactive blue or any other virus-inactivating medium that denatures proteins, since Ag-RDTs  
102 detect intact viral proteins.

103 Our laboratory functions as the Belgian national reference center (NRC) for coronaviruses,  
104 adenoviruses and rotaviruses. The positive samples and positive Ag-RDTs used in this study were  
105 anonymized leftover materials of diagnostic samples, tested by the NRC. The use of patients' residual  
106 materials by the NRC was approved by the UZ Leuven Ethics Committee.

### 107 *Rapid Ag tests (Ag-RDTs)*

108 SARS-CoV-2 Ag-RDTs that were used in this study are: Roche SARS-CoV-2 Rapid Antigen Test Nasal,  
109 Roche Diagnostics, Basel, Switzerland, Ref. 9901-NCOV-01G and 9901-NCOV-06G (**Roche nasal**);  
110 FlowFlex SARS-CoV-2 Antigen Rapid Test (Self-Testing), Acon Laboratories Inc., San Diego, CA, USA,  
111 Ref. L031-118P5 (**FlowFlex**); Newgene COVID-19 Antigen Detection Kit – Nasal Swab, Newgene  
112 Bioengineering, Hangzhou, China, Ref. COVID-19-NG21 (**Newgene**); Coris COVID-19 Ag K-SeT, Coris  
113 BioConcept, Gembloux, Belgium, Ref. K-1525 (**Coris COVID-19**); Alltest: nasal swab test, Hangzhou  
114 Alltest Biotech Co. Ltd., Hangzhou, China, Ref. INCP-502-N (**Alltest**); Boson Rapid SARS-CoV-2 Antigen  
115 Test Card, Xiamen Boson Biotech Co., Ltd., Xiamen, China, Ref. 1N40C5-2 (**Boson**). SARS-CoV-2 /  
116 Influenza dual Ag tests that were used are: Orient Gene Influenza & COVID-19 Ag Combo Rapid Test  
117 Cassette, Zhejiang Orient Gene Biotech Co., Ltd, Zhejiang, China, Ref. GCFC-525a (**Orient**); AMP  
118 Rapid Test CoV-2 Ag + Flu A+B, AMEDA Labordiagnostik GmbH, Graz, Austria, Ref. RT2962 (**AMP**);  
119 Nadal COVID-19 Ag+Influenza A/B plus test, Nal von minden GmbH, Moers, Germany, Ref. 243204N-

120 20 (**Nadal**). For Adenovirus 40/41 and Rotavirus dual Ag test we used the Coris GastroVir K-SeT, Coris  
121 BioConcept, Gembloux, Belgium, Ref. K-1516 (**Coris Gastro**). Tests are referred in Table 1 as indicated  
122 in bold after every test.

123 Direct testing of patients with the Ag-RDTs was done as described in the test instruction manual. For  
124 testing of different Ag-RDTs with positive samples of known viral loads, nasopharyngeal swabs in PBS  
125 that had been stored at 4°C were used. Hundred µl of the PBS solution was mixed with the buffer  
126 included in the test kit. The Ag-RDT test was further performed as described in the test instructions  
127 manual. To assess the effect of the Ag-RDT test buffer on nucleic acid yield, we also performed Ag-  
128 RDT tests without using the buffer solution, by transferring 100 µL of PBS solution directly on to the  
129 sample window of the test cassette. Ag-RDTs run with PBS without patient sample were used as  
130 negative controls.

#### 131 ***Nucleic acid extraction from Ag-RDT test strips***

132 Ag-RDT cassettes were opened by removing the cover, the test strip was taken out and different  
133 parts of the test strip were excised with scissors as indicated in Fig. 1.

134 Punch biopsies were taken from unopened Ag-RDT cassettes at the zone of the sample window and  
135 at the zone of the positive test line, by using a 2 mm diameter sterile disposable biopsy punch (KAI  
136 medical disposable biopsy punch Ref. BP-20F). The biopsy or excised part of the Ag-RDT test strip was  
137 directly added to 275 µL lysis buffer in a 96 well lysis plate for extraction with the MagMAX  
138 Viral/Pathogen II Nucleic Acid Isolation Kit (ThermoFisher Scientific), according to the protocol for  
139 KingFisher Flex.

#### 140 ***Detection of SARS-CoV-2 and Influenza with RT-qPCR***

141 To detect SARS-CoV-2, an RT-qPCR targeting a region in the N2 gene was performed on the  
142 QuantStudio™ 7 Flex Real Time PCR system (Applied Biosystems, ThermoFisher). To amplify the N  
143 gene region, a reaction mix was made using 5 µL TaqMan™ Fast Virus 1-step Master Mix (Applied

144 Biosystems, Cat 4444434), 1.5 µL primer/probe mix from the 2019-nCoV CDC EUA kit (IDT, Cat  
145 10006606) supplemented with 8.5 µL RNase free water to a total volume of 15 µL.

146 For Influenza qPCR a reaction mix was made using 5 µL TaqMan™ Fast Virus 1-step Master Mix  
147 (Applied Biosystems, Cat 4444434) with 0.12 µL forward primer (INFA-3)  
148 5'TCTCATGGAATGGCTAAAGACAAG-3' (50µM) together with 0.2 µL probe (INFA-FP) FAM-5'-  
149 TTCACGCTCACCGTGC-3'-MGB (20µM) and 0.12 µL reverse primer (INFA-2) 5'-  
150 CAAAGCGTCTACGCTGCAGT-3' (50µM) supplemented with 9.56 µL RNase free water to a total  
151 volume of 15 µL.

152 Five µL of viral RNA was added to the reaction mixes. Thermal cycling conditions were 5 minutes at  
153 50°C, 2 minutes at 95°C, followed by 45 cycles of 3 seconds at 95°C and 30 seconds at 60°C. Analysis  
154 was done using the QuantStudio Real-Time PCR Software (Applied Biosystems, ThermoFisher).

### 155 ***Sanger sequencing for virus typing***

156 Sanger sequencing was performed as described in Bloemen et al., 2022 with SARS-CoV-2 primers (S-  
157 VOC-F/S-VOC-R). Additional primers for partial sequencing of influenzavirus  
158 (AM\_FW151/AM\_RV397) were described by Schweiger et al., for adenovirus (F-hex1deg/R-hex2deg)  
159 by Allard et al. and for rotavirus (F-BEG9/R-END9) by Gouvea et al. [22]–[24].

### 160 ***Complete genomic sequencing of SARS-CoV-2***

161 Complete genome sequencing of SARS-CoV-2 on RNA extracted from the Ag-RDT was done with the  
162 nanopore technique using the ARTIC protocol as described in Wawina-Bokalanga et al. [25].  
163 Sequences were analyzed with Nexclade v 2.0.0 (<https://clades.nextstrain.org>)

164

## 165 **RESULTS**

### 166 ***Sequencing of SARS-CoV-2 from archived Ag-RDT***

167 A positive SARS-CoV-2 Ag-RDT (SARS-CoV-2 Rapid Antigen Test Nasal, Roche, Ref. 9901-NCOV-06G),  
168 that had been used according to the test kit instructions to test an infected patient and was kept for  
169 documentation purposes, had been stored at room temperature and not shaded from sunlight for 3  
170 months. As a proof of concept, we tested whether residual viral genetic material could be extracted  
171 from the test strip. On this strip, the positive test line was still clearly visible, and extraction was done  
172 on the positive test strip zone of the test (zone d, indicated in Fig. 1). SARS-CoV-2 RNA could still be  
173 detected by RT-q-PCR, with a Ct value of 27.6. Sanger sequencing on the extracted material allowed  
174 to unambiguously determine the virus variant as Omicron BA.1, based on the partial sequence of the  
175 S-gene RBD (Table 1).

176 We subsequently applied the same method to a Newgene SARS-CoV-2 Ag RDT that had been run  
177 with leftover material of a positive nasopharyngeal swab sample, and was stored under the same  
178 conditions, and were able to perform complete viral typing by WGS. Likewise, viral material could be  
179 retrieved and sequenced from archived SARS-CoV-2/influenza dual Ag-RDTs that had been run with  
180 positive nasopharyngeal swab samples (Table 1).

### 181 ***Evaluation of specimen preparation***

182 The lateral flow rapid Ag tests used in this study all contain a test strip on which the sample is added  
183 via the test window. The sample is absorbed onto the sample pad of the test strip, and is transported  
184 via capillary flow to the distal end of the strip, flowing over the conjugate pad, test line and control  
185 line. To investigate in which area of the test strip the largest amount of viral material from the  
186 sample is maintained, and is thus best suited to be used to extract viral material, different zones of  
187 the test strip were excised with scissors and used for nucleic acid extraction and RT-qPCR (Fig. 1). A  
188 dual antigen test for influenza and COVID-19 (AMP Rapid Test CoV-2 Ag + Flu A+B) that had been run  
189 with an influenza positive sample and a SARS-CoV-2 positive sample, was used for nucleic acid  
190 extraction 3 months after the Ag test was run. The viral nucleic acid yield at different positions was  
191 determined by RT-qPCR for influenza A and SARS-CoV-2 respectively (Table 1: CM-22-1177, CM-22-



192 6381). At all positions that were tested, viral genomic material could be harvested, with the sample  
193 pad resulting in the highest yield for both SARS-CoV-2 and influenza, and the zone distal from the  
194 test line giving the lowest yield for both viruses. We were able to successfully perform Sanger  
195 sequencing on all extracts.

196 To evaluate the possibility of performing extraction from Ag-RDTs in a high throughput environment,  
197 we also tested the use of a punch biopsy sample taken at the test line of the strip. These punch  
198 biopsies can be picked without opening the test cassette. The use of a punch biopsy versus excision  
199 of the test line zone of the strip was compared using a Coris COVID-19 Ag test, and the resulting Ct  
200 value were approximately the same (Table 1: CM-22-8672). Since the biopsy procedure can be  
201 standardized and is relatively easy to use, we decided to use punch biopsies in further experiments.

202 To evaluate whether viral material is conserved at a comparable degree in different brands of SARS-  
203 CoV-2 Ag-RDTs, tests that were commonly used in Belgium at the time of this investigation were run  
204 in parallel using the same positive sample (Ct of 18.5). This resulted in a clear positive test line on all  
205 tests that were analyzed. Twenty-four hours after performing the Ag test, a punch biopsy was taken  
206 from the test line zone and the sample pad of the test strip and used for extraction, followed by RT-  
207 qPCR, Sanger sequencing and WGS. All brands of SARS-CoV-2 Ag-RDTs that were tested allowed  
208 detection of SARS-CoV-2 by RT-qPCR in the punch biopsy, and in all cases variant typing by Sanger  
209 sequencing was possible (Table 1: CM-22-8702). This indicates that conservation of viral material in a  
210 used Ag-RDT did not only occur in one specific brand, and that SARS-CoV-2 Ag-RDTs in general can be  
211 used for genomic surveillance. We did however notice quite extensive differences in the RNA yield  
212 that could be obtained, as indicated by the SARS-CoV-2 Ct value after extraction. Samples extracted  
213 from Alltest, Newgene and Boson resulted in WGS data of good quality whereas the FlowFlex sample  
214 was typable by WGS but data quality was poor.

215 Since the Ag-RDTs use buffers with different compositions, the effect of the buffer on RNA yield was  
216 tested. Samples were loaded on an Ag test with and without addition of the test kit buffer (Table 1,

217 test performed on Roche nasal). For all samples tested, the Ct value of the extract was around 10  
218 points higher when buffer was used, which equals approximately a 1000-fold lower concentration of  
219 viral genomic material. In general, the results of Sanger sequencing were successful when no buffer  
220 was used and good data quality was obtained by WGS. This indicates that some buffer components  
221 are deleterious for the viral genetic material, resulting in lower RNA concentrations and interfering  
222 with sequencing. WGS was not performed on samples that failed for Sanger sequencing given the  
223 high cost of nanopore sequencing.

#### 224 ***Retrieval of viral material of influenza virus, adenovirus and rotavirus from Ag-RDTs***

225 An influenza A virus positive sample (nasopharyngeal swab in viral transport medium), that was  
226 tested in the routine diagnostic lab of the NRC, had been run on the influenza test strip of the AMP,  
227 Orient and Nadal SARS-CoV-2/influenzavirus dual antigen tests. A positive test line for influenza A  
228 was obtained with all three Ag tests. Three months after performing the Ag test, the test line zone  
229 was excised with scissors, and viral material was extracted. After extraction, sequences of influenza A  
230 could be retrieved by Sanger sequencing of part of the M gene for all three Ag tests.

231 Two fecal samples that were positive for both adenovirus and rotavirus by a routine diagnostic test in  
232 the NRC lab were run on Coris GastroVir K-SeT rapid Ag tests. One sample displayed a positive test  
233 line for both adeno- and rotavirus on the strip, while the other sample displayed a positive test line  
234 for rotavirus but not for adenovirus. Punch biopsies were taken from the sampling pad, the rota test  
235 line and the adeno test line of the strips. After extraction of these biopsies, PCR and Sanger  
236 sequencing in the VP7 gene was performed for rotavirus detection. For both samples we detected  
237 the presence of rotavirus G2 in extractions of the biopsies taken at all 3 sampling sites of the test  
238 strip. The adenovirus PCR was also positive for both samples, and sequences of adenovirus 41 were  
239 retrieved, again at all 3 sampling sites of the test strip, also in the sample that did not display a  
240 positive test band.

241

242

243

## 244 **DISCUSSION**

245 Whereas RT-qPCR continues to be the gold standard for COVID-19 diagnosis, rapid Ag-RDTs are  
246 widely used since they offer the benefit of a very short time to results, are cheaper, and easy to use.  
247 A disadvantage of testing through Ag-RDTs so far was that no leftover sample material was available  
248 for genomic characterization of positive samples. Our finding that the test strip used in rapid Ag tests  
249 are suited to preserve intact viral genomic material, even for months, and can serve as source  
250 material for genomic characterization of the virus, could be a gamechanger in the COVID-19 testing  
251 strategy.

252 We demonstrated that a SARS-CoV-2 Ag-RDT that was stored at room temperature up to 3 months  
253 could still serve as source material for genomic surveillance. This implies that used Ag test can be  
254 easily sent to sequencing facilities, even by regular mail. This provides an easy and cheap way to  
255 establish baseline genomic surveillance in countries/regions with limited resources, which would  
256 otherwise remain blind spots thus allowing for novel virus variants to remain under the radar. This  
257 could therefore mean an important improvement in the global coverage of genomic surveillance.

258 In this study, we have tested a total of 9 different Ag-RDTs for SARS-CoV-2 detection (with or without  
259 concurrent influenza detection), and were able to successfully perform Sanger sequencing on  
260 extracted material from all of these. The difference between the original Ct in the sample and the Ct  
261 value after extraction of the test strip largely differed depending on the Ag-RDT used. Our results  
262 indicated that the buffer used by some Ag tests contains a chemical compound that breaks down the  
263 viral RNA and has a negative effect on the quality of sequencing data. For instance, in case of the  
264 Roche nasal test, use of the test kit buffer resulted in a much lower viral RNA yield and made the  
265 extract unusable for sequencing. Use of the same Ag test when putting the samples directly on the

266 cassette (without buffer) resulted in much better yields and good sequencing results, both by Sanger  
267 and by WGS.

268 Nazario-Toole et al. demonstrated recently that whole genome sequencing of SARS-CoV-2 from  
269 excess clinical specimens processed using the BinaxNOW™ COVID-19 Ag Card was feasible [26]. They  
270 however did not assess the effect of prolonged room temperature storage of completed Ag cards,  
271 nor did they study different brands of SARS-CoV-2 Ag-RDTs, or Ag-RDTs for other viruses.

272 We have shown that this method is more widely useable, by demonstrating that genomic material of  
273 influenza virus, adenovirus and rotavirus can also be retrieved from rapid Ag tests. Especially during  
274 the upcoming winter seasons, when an upsurge in COVID-19 is to be expected with concomitant  
275 circulation of other respiratory pathogens such as influenza virus, the use of Ag-RDTs that allow  
276 combined detection of multiple respiratory pathogens, such as COVID-Flu a/b combo tests, can prove  
277 to be a very cost-efficient testing strategy. We have now shown that the use of these Ag tests can be  
278 combined with genomic surveillance, which will remain equally important in the monitoring of novel  
279 variants.

280 We were able to confirm the usability for 10 commercial Ag-RDTs which are commonly used in  
281 Belgium. Since it was not possible to test all commercial Ag-RDTs, a validation experiment for each  
282 brand and with use of different buffer compositions should be performed prior to large scale  
283 implementation of a certain Ag-RDT in genomic surveillance. We plan to further optimize the method  
284 for high-throughput processing.

285

## 286 **ACKNOWLEDGEMENTS**

287 UZ Leuven, as national reference centre, is supported by Sciensano, which is gratefully  
288 acknowledged.

289

## 290 REFERENCES

- 291 [1] WHO, “WHO Coronavirus (COVID-19) Dashboard | WHO Coronavirus (COVID-19) Dashboard  
292 With Vaccination Data.” [Online]. Available: <https://covid19.who.int/>. [Accessed: 16-May-  
293 2022].
- 294 [2] J. R. Marcelin, A. Pettifor, H. Janes, E. R. Brown, J. G. Kublin, and K. E. Stephenson, “COVID-19  
295 Vaccines and SARS-CoV-2 Transmission in the Era of New Variants: A Review and Perspective,”  
296 *Open Forum Infect. Dis.*, 2022.
- 297 [3] V. Pilkington, S. M. Keestra, and A. Hill, “Global COVID-19 Vaccine Inequity: Failures in the  
298 First Year of Distribution and Potential Solutions for the Future,” *Front. Public Heal.*, vol. 10,  
299 no. March, pp. 1–8, 2022.
- 300 [4] V. M. Corman *et al.*, “Comparison of seven commercial SARS-CoV-2 rapid point-of-care  
301 antigen tests: a single-centre laboratory evaluation study,” *The Lancet Microbe*, vol. 2, no. 7,  
302 pp. e311–e319, 2021.
- 303 [5] N. Kohmer *et al.*, “Article the comparative clinical performance of four SARS-CoV-2 rapid  
304 antigen tests and their correlation to infectivity in vitro,” *J. Clin. Med.*, vol. 10, no. 2, pp. 1–11,  
305 2021.
- 306 [6] WHO, “Antigen-detection in the diagnosis of SARS-CoV-2 infection,” *Interim Guid.*, no. 6  
307 October, 2021.
- 308 [7] WHO, “Use of SARS-CoV-2 antigen-detection rapid diagnostic tests for COVID-19 self-testing,”  
309 *Interim Guid.*, no. 9 March, pp. 1–16, 2022.
- 310 [8] WHO, “Tracking SARS-CoV-2 variants.” [Online]. Available:  
311 <https://www.who.int/activities/tracking-SARS-CoV-2-variants>. [Accessed: 16-May-2022].
- 312 [9] ECDC, “SARS-CoV-2 variants of concern as of 12 May 2022.” [Online]. Available:

- 313 <https://www.ecdc.europa.eu/en/covid-19/variants-concern>. [Accessed: 16-May-2022].
- 314 [10] J. D. Robishaw *et al.*, “Genomic surveillance to combat COVID-19: challenges and  
315 opportunities,” *The Lancet Microbe*, vol. 2, no. 9, pp. e481–e484, 2021.
- 316 [11] WHO, “Recommendations For National SARS-Cov-2 Testing Strategies And Diagnostic  
317 Capacities,” *Interim Guid.*, no. June 25, pp. 1–16, 2021.
- 318 [12] WHO, *Genomic sequencing of SARS-CoV-2*, no. January 8. 2021.
- 319 [13] A. Rambaut *et al.*, “A dynamic nomenclature proposal for SARS-CoV-2 lineages to assist  
320 genomic epidemiology,” *Nat. Microbiol.*, vol. 5, no. 11, pp. 1403–1407, 2020.
- 321 [14] M. Bloemen *et al.*, “Fast detection of SARS-CoV-2 variants including Omicron using one-step  
322 RT-PCR and Sanger sequencing,” *J. Virol. Methods*, vol. 304, no. March, p. 114512, 2022.
- 323 [15] E. Wollants, P. Maes, I. Thoelen, F. Vanneste, M. Rahman, and M. Van Ranst, “Evaluation of a  
324 norovirus sampling method using sodium dodecyl sulfate/EDTA-pretreated chromatography  
325 paper strips,” *J. Virol. Methods*, vol. 122, no. 1, pp. 45–48, 2004.
- 326 [16] P. Maes *et al.*, “Poliovirus sampling by using sodium dodecyl sulfate/EDTA-pretreated  
327 chromatography paper strips,” *Biochem. Biophys. Res. Commun.*, vol. 325, no. 3, pp. 711–715,  
328 2004.
- 329 [17] M. Rahman *et al.*, “Chromatography Paper Strip Method for Collection, Transportation, and  
330 Storage of Rotavirus RNA in Stool Samples,” *J. Clin. Microbiol.*, vol. 42, no. 4, pp. 1605–1608,  
331 2004.
- 332 [18] K. T. Zlateva, P. Maes, M. Rahman, and M. Van Ranst, “Chromatography paper strip sampling  
333 of enteric adenoviruses type 40 and 41 positive stool specimens,” *Virol. J.*, vol. 2, pp. 1–5,  
334 2005.
- 335 [19] ECDC, “Increase in severe acute hepatitis cases of unknown aetiology in children,” *Rapid Risk*

- 336            *Assess.*, no. April 28, pp. 1–19, 2022.
- 337    [20]    J. M. Baker *et al.*, “Acute Hepatitis and Adenovirus Infection Among Children - Alabama,  
338            October 2021-February 2022.,” *MMWR. Morb. Mortal. Wkly. Rep.*, vol. 71, no. 18, pp. 638–  
339            640, 2022.
- 340    [21]    K. Marsh *et al.*, “Investigation into cases of hepatitis of unknown aetiology among young  
341            children, Scotland, 1 January 2022 to 12 April 2022,” *Eurosurveillance*, vol. 27, no. 15, pp. 1–7,  
342            2022.
- 343    [22]    B. Schweiger, I. Zadow, R. Heckler, H. Timm, and G. Pauli, “Application of a fluorogenic PCR  
344            assay for typing and subtyping of influenza viruses in respiratory samples,” *J. Clin. Microbiol.*,  
345            vol. 38, no. 4, pp. 1552–1558, 2000.
- 346    [23]    A. Allard, B. Albinsson, and G. Wadell, “Rapid typing of human adenoviruses by a general PCR  
347            combined with restriction endonuclease analysis,” *J. Clin. Microbiol.*, vol. 39, no. 2, pp. 498–  
348            505, 2001.
- 349    [24]    V. Gouvea *et al.*, “Polymerase chain reaction amplification and typing of rotavirus nucleic acid  
350            from stool specimens,” *J. Clin. Microbiol.*, vol. 28, no. 2, pp. 276–282, 1990.
- 351    [25]    T. Wawina-Bokalanga *et al.*, “Genetic diversity and evolution of SARS-CoV-2 in Belgium during  
352            the first wave outbreak,” *bioRxiv*, p. 2021.06.29.450330, 2021.
- 353    [26]    A. Nazario-Toole, H. M. Nguyen, H. Xia, D. N. Frankel, J. W. Kieffer, and T. F. Gibbons,  
354            “Sequencing SARS-CoV-2 from antigen tests,” *PLoS One*, vol. 17, no. 2 February, pp. 1–8, 2022.
- 355
- 356
- 357
- 358

359 **TABLE**

360 **Table 1: Retrieval of viral material from rapid Ag tests**

|                                    | SAMPLE      |            |             | ANTIGEN TEST   |               |             |                 | RESULT     |            |        |
|------------------------------------|-------------|------------|-------------|----------------|---------------|-------------|-----------------|------------|------------|--------|
|                                    | virus       | code       | sample Ct   | Name           | use of buffer | region*     | $\Delta t^{**}$ | extract Ct | Sanger seq | WGS    |
| archived Ag-RDT                    | SARS-CoV-2  | CV-22-2069 | UNK         | Roche nasal    | YES           | zone d      | 3 mths          | 27.6       | BA.1       | ND     |
|                                    | SARS-CoV-2  | X-22-0205  | UNK         | Newgene        | YES           | zone d      | 3 mths          | ND         | BA.2       | BA.2   |
|                                    | SARS-CoV-2  | CM-22-5857 | 18.6        | AMP            | YES           | zone d      | 3 mths          | 26.7       | BA.2       | ND     |
|                                    | SARS-CoV-2  | CM-22-5857 | 18.6        | Orient         | YES           | zone d      | 3 mths          | 25.6       | BA.2       | ND     |
|                                    | SARS-CoV-2  | CM-22-5857 | 18.6        | Nadal          | YES           | zone d      | 3 mths          | 26.3       | BA.2       | ND     |
|                                    | Influenza A | BE-22-2238 | 24.6        | AMP            | YES           | zone d      | 3 mths          | 35.4       | H3N2       | ND     |
|                                    | Influenza A | BE-22-2238 | 24.6        | Orient         | YES           | zone d      | 3 mths          | 32.2       | H3N2       | ND     |
|                                    | Influenza A | BE-22-2238 | 24.6        | Nadal          | YES           | zone d      | 3 mths          | 32.2       | H3N2       | ND     |
| Evaluation of specimen preparation | SARS-CoV-2  | CM-22-1177 | 16.5        | AMP            | YES           | zone a      | 3 mths          | 17.3       | BA.2       | ND     |
|                                    | SARS-CoV-2  | CM-22-1177 | 16.5        | AMP            | YES           | zone b      | 3 mths          | 22.2       | BA.2       | ND     |
|                                    | SARS-CoV-2  | CM-22-1177 | 16.5        | AMP            | YES           | zone c      | 3 mths          | 19.6       | BA.2       | ND     |
|                                    | SARS-CoV-2  | CM-22-1177 | 16.5        | AMP            | YES           | zone d      | 3 mths          | 21.7       | BA.2       | ND     |
|                                    | SARS-CoV-2  | CM-22-1177 | 16.5        | AMP            | YES           | zone e      | 3 mths          | 22.6       | BA.2       | ND     |
|                                    | Influenza A | CM-22-6381 | 18.5        | AMP            | YES           | zone a      | 3 mths          | 28.6       | H3N2       | NA     |
|                                    | Influenza A | CM-22-6381 | 18.5        | AMP            | YES           | zone b      | 3 mths          | 29.9       | H3N2       | NA     |
|                                    | Influenza A | CM-22-6381 | 18.5        | AMP            | YES           | zone c      | 3 mths          | 29.3       | H3N2       | NA     |
|                                    | Influenza A | CM-22-6381 | 18.5        | AMP            | YES           | zone d      | 3 mths          | 30.6       | H3N2       | NA     |
|                                    | Influenza A | CM-22-6381 | 18.5        | AMP            | YES           | zone e      | 3 mths          | 33.3       | H3N2       | NA     |
|                                    | SARS-CoV-2  | CM-22-8672 | 16.5        | Coris COVID-19 | YES           | zone d      | 24h             | 28.7       | ND         | ND     |
|                                    | SARS-CoV-2  | CM-22-8672 | 16.5        | Coris COVID-19 | YES           | PB zone d   | 24h             | 28.8       | ND         | ND     |
|                                    | SARS-CoV-2  | CM-22-8702 | 18.5        | Alltest        | YES           | PB zone a+d | 24h             | 27         | BA.2       | BA.2   |
|                                    | SARS-CoV-2  | CM-22-8702 | 18.5        | Newgene        | YES           | PB zone a+d | 24h             | 21.3       | BA.2       | BA.2   |
|                                    | SARS-CoV-2  | CM-22-8702 | 18.5        | FlowFlex       | YES           | PB zone a+d | 24h             | 20.9       | BA.2       | BA.2   |
|                                    | SARS-CoV-2  | CM-22-8702 | 18.5        | Boson          | YES           | PB zone a+d | 24h             | 26.5       | BA.2       | BA.2   |
|                                    | SARS-CoV-2  | CM-22-6505 | 12.6        | Roche nasal    | YES           | PB zone a+d | 72h             | 32.5       | Failed     | ND     |
|                                    | SARS-CoV-2  | CM-22-6505 | 12.6        | Roche nasal    | NO            | PB zone a+d | 72h             | 19.5       | BA.2       | BA.2   |
|                                    | SARS-CoV-2  | CM-22-6516 | 20.6        | Roche nasal    | YES           | PB zone a+d | 72h             | 35.8       | Failed     | ND     |
|                                    | SARS-CoV-2  | CM-22-6516 | 20.6        | Roche nasal    | NO            | PB zone a+d | 72h             | 28.8       | BA.2       | BA.2   |
|                                    | SARS-CoV-2  | CM-22-3708 | 18.1        | Roche nasal    | YES           | PB zone a+d | 72h             | 32.9       | Failed     | ND     |
|                                    | SARS-CoV-2  | CM-22-3708 | 18.1        | Roche nasal    | NO            | PB zone a+d | 72h             | 23.4       | BA.4/BA.5  | BA.5.1 |
|                                    | SARS-CoV-2  | CM-22-4853 | 14.7        | Roche nasal    | YES           | PB zone a+d | 72h             | 33.3       | Failed     | ND     |
| SARS-CoV-2                         | CM-22-4853  | 14.7       | Roche nasal | NO             | PB zone a+d   | 72h         | 22.0            | BA.4/BA.5  | BA.4       |        |
| SARS-CoV-2                         | CM-22-7973  | 15.8       | Roche nasal | YES            | PB zone a+d   | 72h         | 31.2            | Failed     | ND         |        |
| SARS-CoV-2                         | CM-22-7973  | 15.8       | Roche nasal | NO             | PB zone a+d   | 72h         | 22.9            | BA.4/BA.5  | BA.5.1     |        |
| Other viruses                      | AdV 40/41   | F14284     | UNK         | Coris Gastro   | YES           | PB          | 24u             | pos        | AdV 41     | NA     |
|                                    | AdV 40/41   | F14298     | UNK         | Coris Gastro   | YES           | PB          | 24u             | pos        | AdV 41     | NA     |
|                                    | Rotavirus   | F14284     | UNK         | Coris Gastro   | YES           | PB          | 24u             | pos        | G2         | NA     |
|                                    | Rotavirus   | F14298     | UNK         | Coris Gastro   | YES           | PB          | 24u             | pos        | G2         | NA     |



361

362 \* region of test strip excised and used for extraction, as indicated in Figure 1

363 \*\* time between adding sample to Ag-RDT and nucleic acid extraction from the test strip

364 PB= punch biopsy; UNK = unknown; ND = Not Done; NA = not available

365 WGS results of poor quality (as indicated by Nextclade) are shaded in grey.

366

367 **FIGURE**

368

369

370

371

372

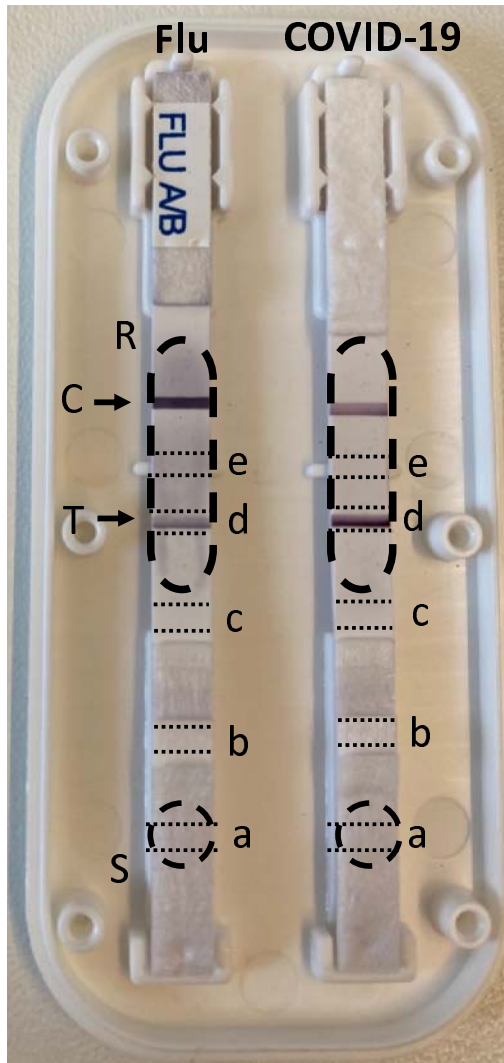

Figure 1: Opened cassette of an Orient Gene Influenza & COVID-19 Ag Combo Rapid Test, with dashed lines indicating the position of the sample windows (S) and result windows (R), displaying a positive test line (T) and control line (C). Regions excised for nucleic acid extraction (a-e) are delineated with dotted lines.
